# Supplementary material for: Efficacy and safety of alemtuzumab over 6 years: final results of the 4-year CARE-MS extension trial
Source: PubMed Central journal article supplement — Ther Adv Neurol Disord. 2021 Apr 23;14:1756286420982134. doi: 10.1177/1756286420982134 (PMC8072102; doi:10.1177/1756286420982134), 2021-04-23
Supplement: sj-pdf-1-tan-10.1177_1756286420982134.pdf [file sj-pdf-1-tan-10.1177_1756286420982134.pdf]

**Supplemental Table 1 Proportion of alemtuzumab-only patients and IFN-alemtuzumab patients who received  $\geq 3$  alemtuzumab courses through Year 6.**

| <b>Total Number of Alemtuzumab Courses, n (%)</b> |                             | <b>3</b>         | <b>4</b>        | <b>5</b>             | <b>6</b>             |
|---------------------------------------------------|-----------------------------|------------------|-----------------|----------------------|----------------------|
| <b>Alemtuzumab-only</b>                           | <b>CARE-MS I<br/>N=349</b>  | <b>82 (23%)</b>  | <b>29 (8%)</b>  | <b>12 (3%)</b>       | <b>1 (0.3%)</b>      |
|                                                   | <b>CARE-MS II<br/>N=387</b> | <b>114 (29%)</b> | <b>50 (13%)</b> | <b>9 (2%)</b>        | <b>4 (1%)</b>        |
| <b>IFN-alemtuzumab</b>                            | <b>CARE-MS I<br/>N=139</b>  | <b>29 (21%)</b>  | <b>5 (4%)</b>   | <b>0<sup>a</sup></b> | <b>0<sup>a</sup></b> |
|                                                   | <b>CARE-MS II<br/>N=143</b> | <b>29 (20%)</b>  | <b>7 (5%)</b>   | <b>0<sup>a</sup></b> | <b>0<sup>a</sup></b> |

<sup>a</sup>The maximum number of courses that the IFN-alemtuzumab group could receive was four within the 6-year trials, since these patients did not receive their first and second courses of alemtuzumab until years 3 and 4, respectively, and additional courses could not be given until  $\geq 12$  months after the previous one.

CARE-MS, Comparison of Alemtuzumab and Rebif<sup>®</sup> Efficacy in Multiple Sclerosis; IFN, interferon.

### Supplemental Figure 1 Efficacy outcomes from extension baseline in CARE-MS I and II IFN-alemtuzumab patients who did or did not achieve NEDA in the core studies

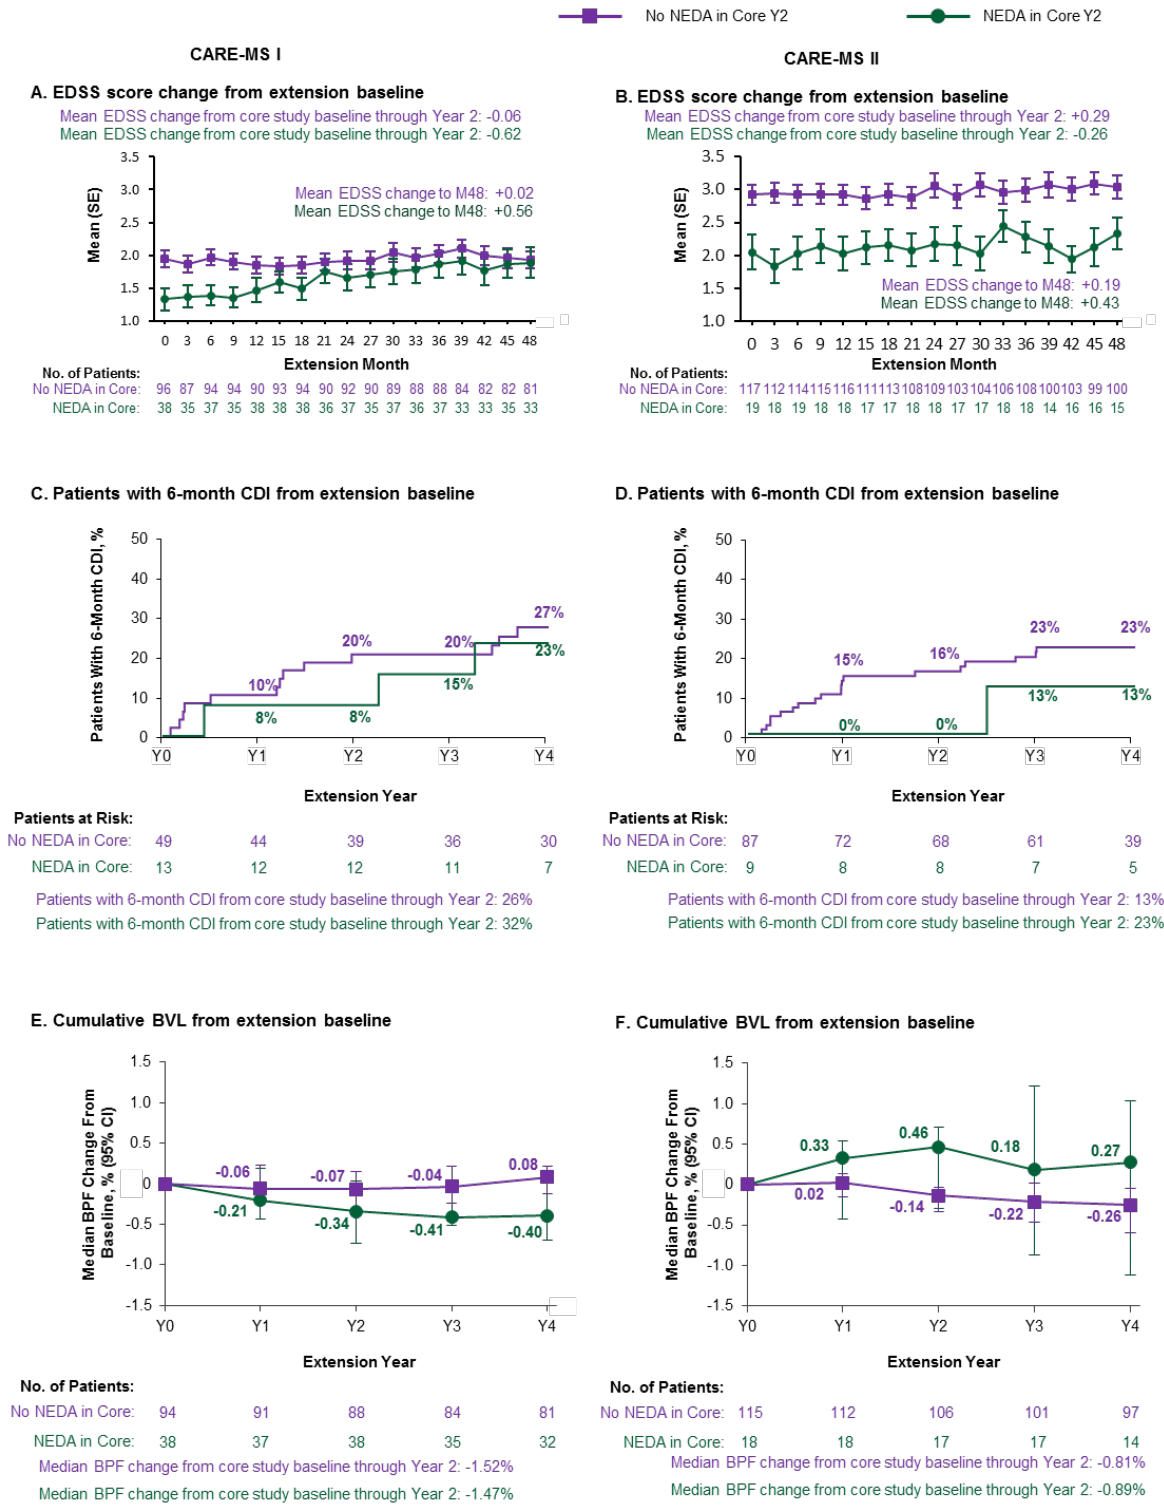

**Supplemental Figure 1 Efficacy outcomes from extension baseline in CARE-MS I and II IFN-alemtuzumab patients who did or did not achieve NEDA in the core studies**

Results are shown for the CARE-MS I and II IFN-alemtuzumab patients who did or did not achieve NEDA during the core studies. (A and B) Mean (SE) change in EDSS score from extension baseline through extension year 4 in CARE-MS I (A) and CARE-MS II (B) patients. (C and D) Kaplan-Meier estimates of the percentages of patients with 6-month CDI from extension baseline through extension year 4 in CARE-MS I (C) and CARE-MS II (D) patients. (E and F) Median cumulative percentage BVL from extension study baseline through the end of CAMMS03409 in CARE-MS I (E) and CARE-MS II (F) patients. BPF, brain parenchymal fraction; BVL, brain volume loss; CARE-MS, Comparison of Alemtuzumab and Rebif<sup>®</sup> Efficacy in Multiple Sclerosis; CDI, confirmed disability improvement; EDSS, Expanded Disability Status Scale; IFN, interferon; SE, standard error; Y, year.
